# Supplementary material for: Serum dehydroepiandrosterone levels are associated with lower risk of type 2 diabetes: the Rotterdam Study
Source: Springer Nature journal article supplement (doi:10.1007/s00125-016-4136-8), 2016-10-22

## **Electronic Supplementary Material (ESM)**

ESM Table 1 Comparison of the predictive value of DHEA with its derivatives.

ESM Fig. 1 Flow chart of subjects eligibility.

ESM Fig. 2 DHEA and its main derivatives in steroidogenesis.

ESM Table 1. Comparison of the predictive value of DHEA with its derivatives.

|                  | c-statistics (95%CI) | c-statistics changes (95% CI) from base model |
|------------------|----------------------|-----------------------------------------------|
| Base model       | 0.637 (0.609, 0.666) | NA                                            |
| +DHEA            | 0.638 (0.612, 0.665) | 0.001 (-0.003, 0.005)                         |
| +DHEAS           | 0.637 (0.610, 0.666) | 0.000 (-0.004, 0.005)                         |
| +androstenedione | 0.637 (0.608, 0.667) | 0.000 (-0.002, 0.002)                         |
| +DHEAS/DHEA      | 0.637 (0.609, 0.666) | 0.000 (-0.001, 0.001)                         |

Base model: age, sex, parental history of diabetes, body mass index (Wilson`s base model).

ESM Fig. 1.

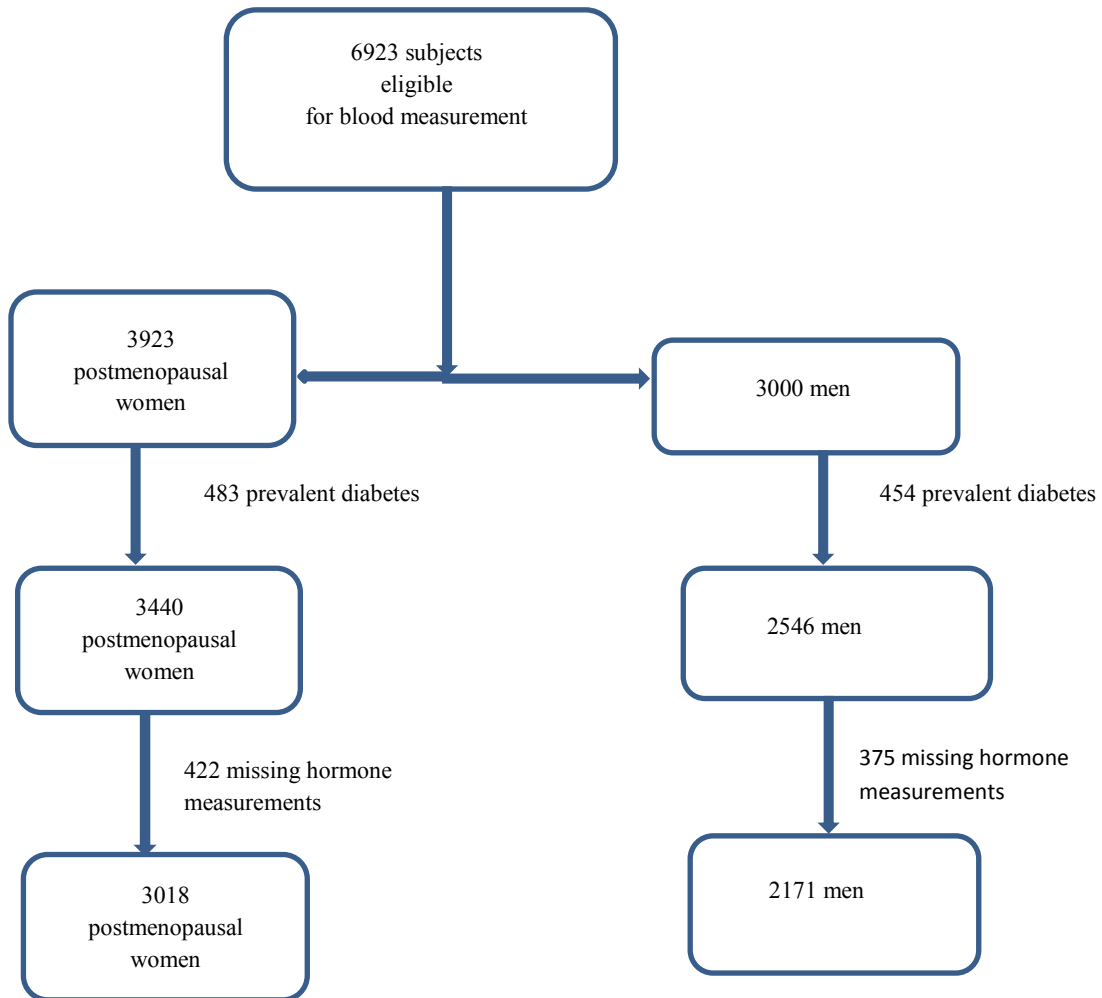

ESM Fig. 2.

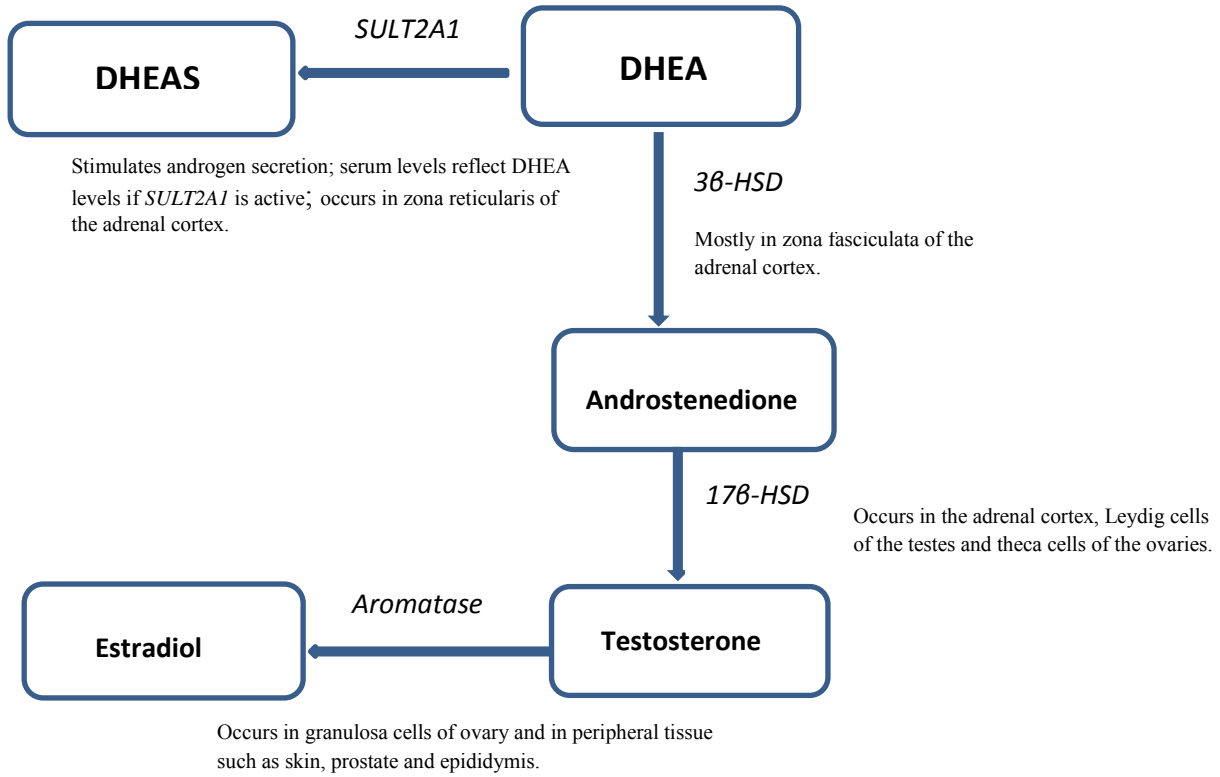

Supplement: MOESM1 [file 10957556]
